# Supplementary material for: Cerebral amyloid angiopathy distribution in older people: A cautionary note
Source: PubMed Central journal article supplement — Alzheimers Dement (N Y). 2021 Feb 16;7(1):e12145. doi: 10.1002/trc2.12145 (PMC7885797; doi:10.1002/trc2.12145), 2021-02-16
Supplement: TRC2-7-e12145-s001.pdf [file TRC2-7-e12145-s001.pdf]

1 **Supplementary File for:**

2 **Cerebral amyloid angiopathy distribution: a cautionary note [correct title]**

3 Vafa Alakbarzade PhD<sup>1\*</sup>, Jonathan MR French MBBS<sup>2,5</sup>, David R Howlett PhD<sup>2</sup>, Johannes  
4 Attems MD<sup>3</sup>, Paul T Francis PhD<sup>2</sup>, Sarah Stratton MSc<sup>4</sup>, Camilla N Clark PhD<sup>1</sup>, Anthony C  
5 Pereira MD<sup>1</sup> and Atticus H Hainsworth PhD<sup>1,4</sup>

6 <sup>1</sup>St George's University Hospitals, London, UK

7 <sup>2</sup>King's College London, London, UK

8 <sup>3</sup>Newcastle University, Newcastle upon Tyne, UK

9 <sup>4</sup>St George's, University of London, London, UK

10 <sup>5</sup>Bristol Royal Infirmary, Bristol, UK

11 \*correspondence:

12 Atticus H Hainsworth MA PhD

13 Reader in Cerebrovascular Disease

14 St George's University of London

15 Cranmer Terrace, London SW17 0RE

16 T +44 208 725 5586 F +44 208 725 2950

17 E ahainsworth@sgul.ac.uk

18



## 20 **Methods Supplementary file**

21 Tissue for the post-mortem study was obtained from cognitively impaired or cognitively  
22 normal elderly subjects recruited to longitudinal studies with post-mortem follow-up the UK.  
23 The sites from which tissue was obtained were part of the Brains for Dementia Research  
24 (BDR) network (<https://bdr.alzheimersresearchuk.org/researchers/>). The final tissue selection  
25 was based solely on the availability of tissue from the frontal cerebral cortex. BDR recruits  
26 from a network of 6 UK dementia research centres (King's College London, Bristol,  
27 Manchester, Oxford, Cardiff and Newcastle). Participants are predominantly older people  
28 (aged 65 years or more), 60% female and almost entirely Caucasian ethnicity (99%). Details  
29 of inclusion criteria for BDR are given in Francis et al. 2018[1]. For all brains, full  
30 neuropathological dissection, sampling, and characterization was undertaken according to a  
31 standardized BDR protocol by experienced neuropathologists in each of the 6 BDR network  
32 brain banks. This protocol, arrived at by consensus across the BDR network and based on the  
33 BrainNet Europe initiative[2], generates a narrative description of the regional pathology  
34 within the brain together with standardized scoring for Braak tangle pathology, Braak Lewy  
35 body score, Thal phase of Abeta pathology, Consortium to Establish a Registry of  
36 Alzheimer's Disease (CERAD) classification, extent, location, and classification of vascular  
37 pathology and TDP43 status.

38 We diluted antibodies in primary layer diluent (0.3% v/v Triton-X-100, 0.01% w/v sodium  
39 azide and 2% v/v normal serum in phosphate buffered saline) and treated with 98% formic  
40 acid for 15 minutes. The immunohistochemical determinations are of A $\beta$ 40 and A $\beta$ 42. The  
41 two antibodies used (G30 and 20G10) recognise the C-terminal neoepitopes ending at A $\beta$  x-  
42 40 and A $\beta$  x-42. Mouse monoclonal 20G10 was raised against the A $\beta$ 35-42 fragment and  
43 selected for its C-terminal A $\beta$ 42 specificity. Rabbit antiserum G30 was raised against A $\beta$ 35-  
44 42 for A $\beta$ 40[3]. A $\beta$ 40 and A $\beta$ 42 density was analysed as per positive vessel centimetre

45 square for each section (Figure 1). Low magnification images were captured for entire  
46 sections to allow the determination of the total area (cm<sup>2</sup>) of each section. A $\beta$ 40 and A $\beta$ 42  
47 density was analysed as number of +ve vessels per cm<sup>2</sup>. See Figure S1.

48 Mouse monoclonal 20G10 was raised against the A $\beta$ 35–42 fragment and selected for its C-  
49 terminal A $\beta$ 42 specificity. Rabbit antiserum G30 was raised against CMVGGVV for A $\beta$ 40.  
50 C-terminal specificity of G30 and 20G10 for A $\beta$ 40 and A $\beta$ 42, respectively, was established  
51 by preincubation of the antibody with a 10-fold excess of the cognate A $\beta$ 1–40 or A $\beta$ 42  
52 peptides, which completely obliterated the ability of both primary antibodies to label amyloid  
53 deposits in sections of double-transgenic mouse brain. In contrast, preincubation of G30 or  
54 20G10 with an excess of the other's cognate peptide had no discernible effect on  
55 immunolabelling[4].

56 Sections were viewed on a Leica DMRB epifluorescence microscope (Leica Microsystems,  
57 Milton Keynes, UK). Immunofluorescent labelling of A $\beta$ 42 (20G10 antibody) was viewed in  
58 the green channel and A $\beta$ 40 (G30 antibody) in the red channel. All sections were viewed in a  
59 blinded, random sequence. The entirety of each section was methodically examined for  
60 arterial vessels containing fluorescence at 100x magnification, in both channels. Capillaries  
61 were excluded. Images of positive vessels were captured for both channels with a DFC420  
62 camera (Leica Microsystems). 3034 images were sampled in total. Definition of CAA  
63 positivity was performed by a single blinded observer (JMRF) blind to neuropathological  
64 group assignment (DRH). Examples of vessels positive for A $\beta$ 40-CAA, A $\beta$ 42-CAA, or both,  
65 are shown in Supplementary Figure 1. Observer-dependent assessment of CAA positivity was  
66 confirmed using automated image analysis with ImageJ software (<http://rsbweb.nih.gov/ij/>).  
67 A threshold was defined in an unlabelled area of tissue, to eliminate background  
68 fluorescence. The immunolabelled area defined by ImageJ was highly correlated with  
69 observer-defined positive vessel number and was highly significant (for A $\beta$ 40, Spearman's

70  $r=0.974, p<0.001$ ). We referred to significant CAA when at least 5 vessels or plaques were  
71 A $\beta$ 40 and A $\beta$ 42 positive. Across the cohort, there were 39 cases without significant CAA (<5  
72 CAA+ vessels/cm<sup>2</sup>). Among these, only 15 (38.5%) lacked significant parenchymal plaques  
73 (<5 plaques/cm<sup>2</sup>), i.e., 24 (61.5%) had significant parenchymal plaques (6 Controls, 14 Other  
74 neurodegenerative, 4 AD). Among the cases with significant CAA, most (23/26, 88.5%) had  
75 significant parenchymal plaques. Across the cohort, the correlation between A $\beta$  CAA+ vessel  
76 density and parenchymal plaque density was low (Pearson R: 0.192 for A $\beta$ 40, 0.143 for  
77 A $\beta$ 42). Within each of the 3 sub-groups, correlations were similarly low.

78 **Supplementary Figure 1.** Examples of small arterial vessels exhibiting CAA, positive for  
79 A $\beta$ 40 only (top panels, A), or both A $\beta$ 40 and A $\beta$ 42 (middle panels, B) or A $\beta$ 42 only (Lower  
80 panels, C). Scale bars 100 microns.

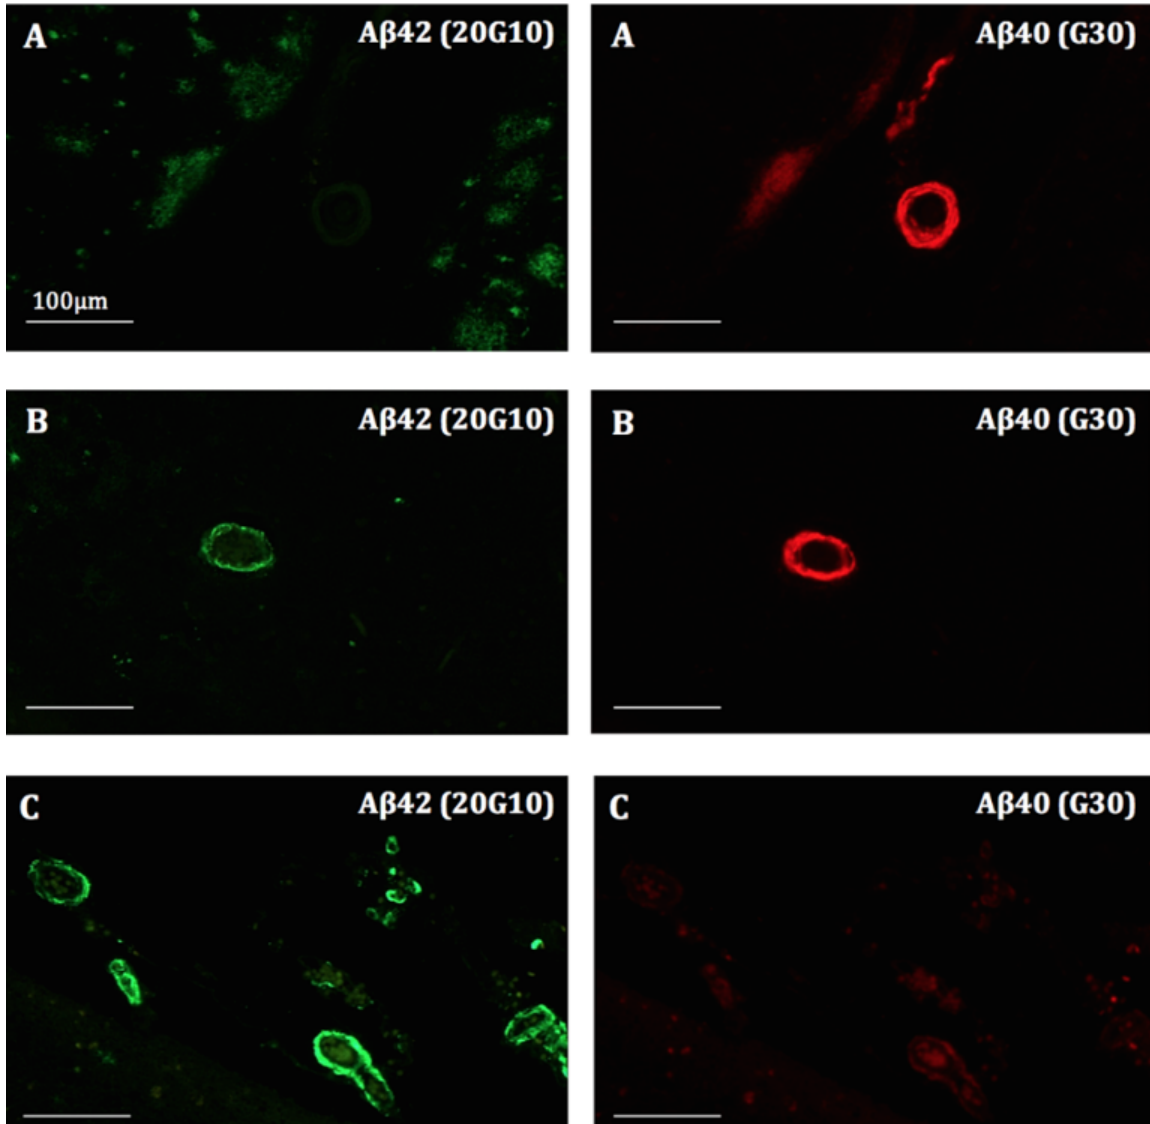

81

82 **Reference**

83

84 [1] Francis PT, Costello H, Hayes GM. Brains for Dementia Research: Evolution in a Longitudinal Brain  
 85 Donation Cohort to Maximize Current and Future Value. *J Alzheimers Dis.* 2018;66:1635-44.

86 [2] Klioueva NM, Rademaker MC, Dexter DT, Al-Sarraj S, Seilhean D, Streichenberger N, et al.  
 87 BrainNet Europe's Code of Conduct for brain banking. *J Neural Transm (Vienna).* 2015;122:937-40.

88 [3] Howlett DR, Hortobagyi T, Francis PT. Clusterin associates specifically with Abeta40 in Alzheimer's  
 89 disease brain tissue. *Brain Pathol.* 2013;23:623-32.

90 [4] Howlett DR, Richardson JC, Austin A, Parsons AA, Bate ST, Davies DC, et al. Cognitive correlates of  
91 Abeta deposition in male and female mice bearing amyloid precursor protein and presenilin-1  
92 mutant transgenes. Brain Res. 2004;1017:130-6.  
93
